# Supplementary material for: Flexible Waterproof Piezoresistive Pressure Sensors with Wide Linear Working Range Based on Conductive Fabrics
Source: PubMed Central journal article supplement (PMC7770928; doi:10.1007/s40820-020-00498-y), 2020-08-08
Supplement: 40820_2020_498_MOESM1_ESM.pdf [file 40820_2020_498_MOESM1_ESM.pdf]

Supporting Information for

## Flexible Waterproof Piezoresistive Pressure Sensors with Wide Linear Working Range Based on Conductive Fabrics

Hongcheng Xu<sup>1,2,†</sup>, Libo Gao<sup>1,2,†,\*</sup>, Yuejiao Wang<sup>3,4,†</sup>, Ke Cao<sup>1,2</sup>, Xinkang Hu<sup>1,2</sup>, Liang Wang<sup>5</sup>, Meng Mu<sup>1,2</sup>, Min Liu<sup>1,2</sup>, Haiyan Zhang<sup>1,2</sup>, Weidong Wang<sup>1,2,\*</sup>, Yang Lu<sup>2,3,4,\*</sup>

<sup>1</sup>School of Mechano-Electronic Engineering, Xidian University, Xi'an 710071, People's Republic of China

<sup>2</sup>CityU-Xidian Joint Laboratory of Micro/Nano-Manufacturing, Xi'an 710071, People's Republic of China

<sup>3</sup>Department of Mechanical Engineering, City University of Hong Kong, Hong Kong SAR, Kowloon 999077, Hong Kong, China

<sup>4</sup>Nano-Manufacturing Laboratory (NML), Shenzhen Research Institute of City University of Hong Kong, Shenzhen 518057, People's Republic of China

<sup>5</sup>Micro-/Nano-technology Research Center, State Key Laboratory for Manufacturing Systems Engineering, Xi'an Jiaotong University, Xi'an 710049, People's Republic of China

<sup>†</sup> Hongcheng Xu, Libo Gao, and Yuejiao Wang contributed equally to this work.

\*Corresponding authors. E-mail: [lbcao@xidian.edu.cn](mailto:lbcao@xidian.edu.cn) (Libo Gao); [wangwd@mail.xidian.edu.cn](mailto:wangwd@mail.xidian.edu.cn) (Weidong Wang); [yanglu@cityu.edu.hk](mailto:yanglu@cityu.edu.hk) (Yang Lu)

### Supplementary Figures

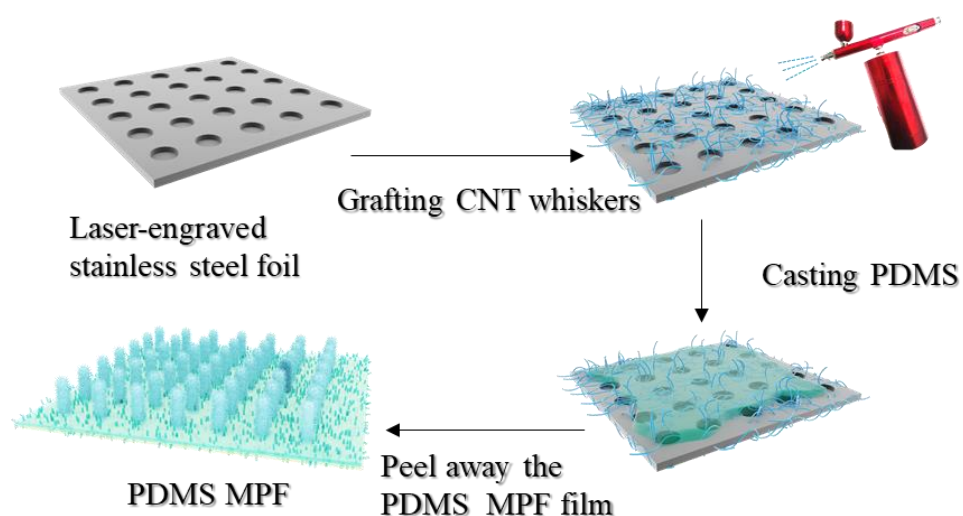

**Fig. S1** Experimental process for preparation of PDMS micro pillar film (MPF)

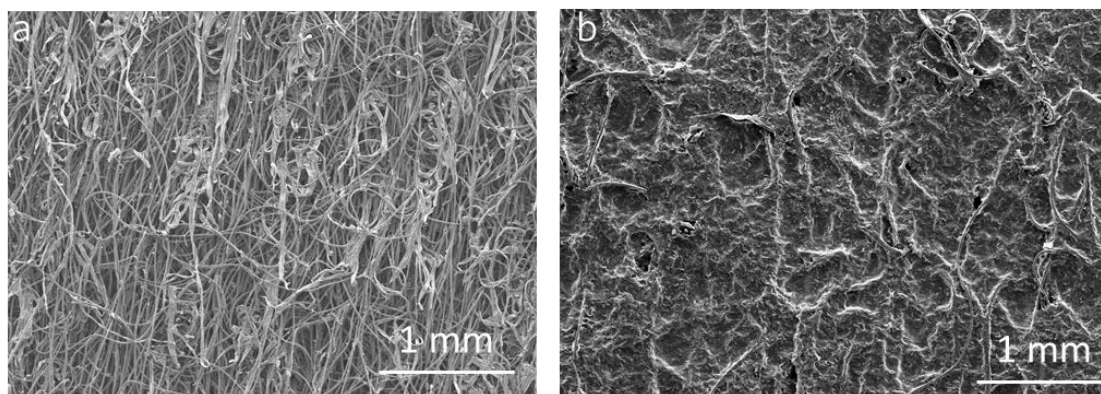

**Fig. S2** Scanning electron microscope (SEM) of a non-woven fabrics (nWF) and b Graphite flakes (GFs) coated nWF

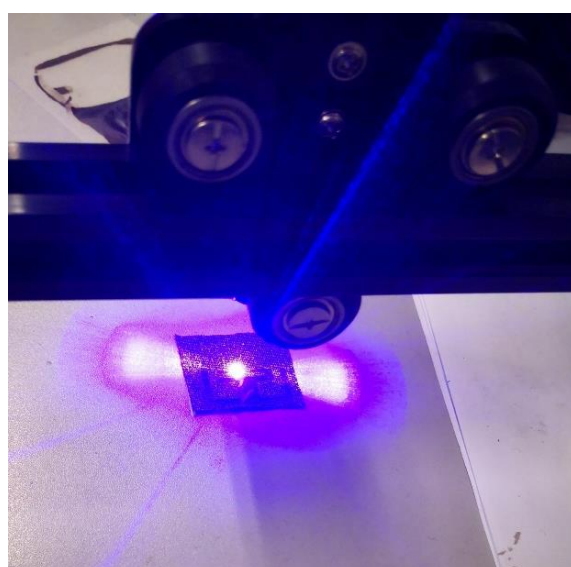

**Fig. S3** SF was engraved by the laser

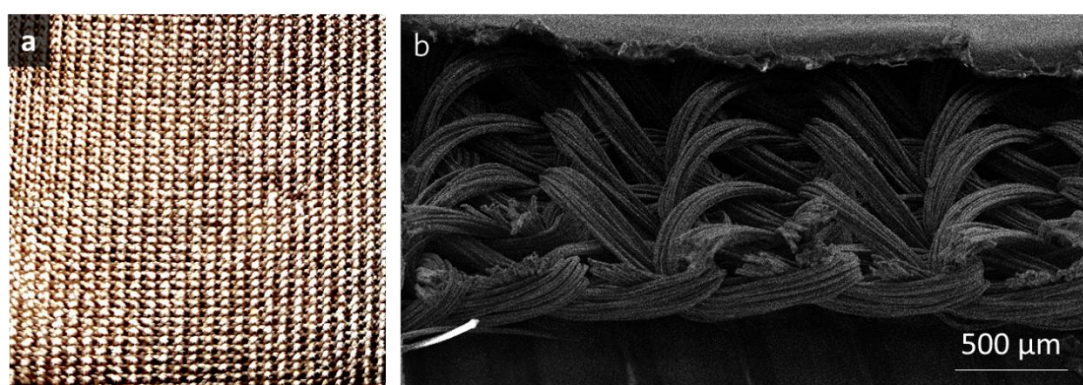

**Fig. S4** a Digital optical images of Silver fabrics (SF) on the top view and b Side view SEM image of the SF

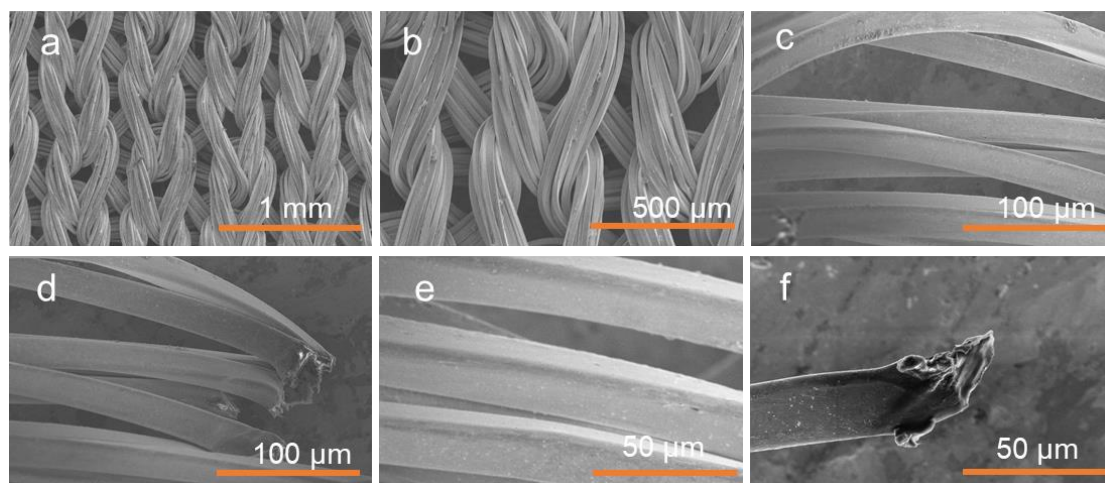

**Fig. S5** SEM image of the SF and corresponding silver threads

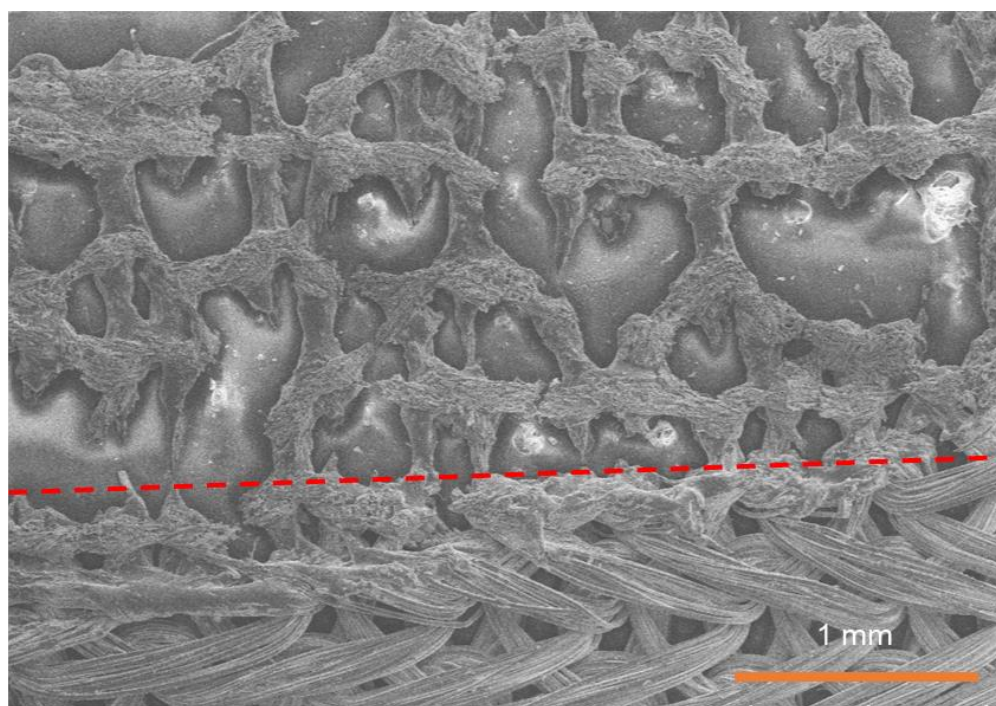

**Fig. S6** Optical image and microscopes of the SF

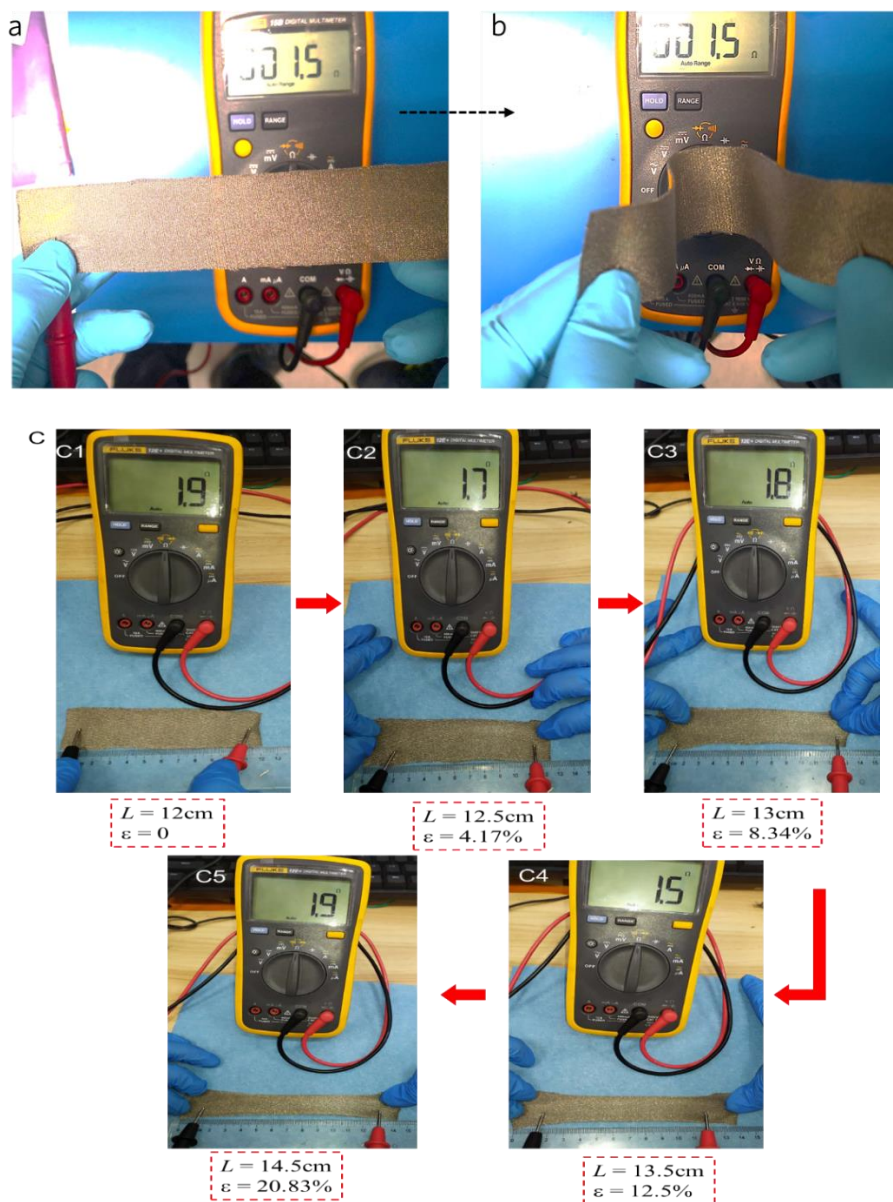

**Fig. S7** Resistance of the SF electrode at (a) Flat, (b) bending, and (c) stretching status

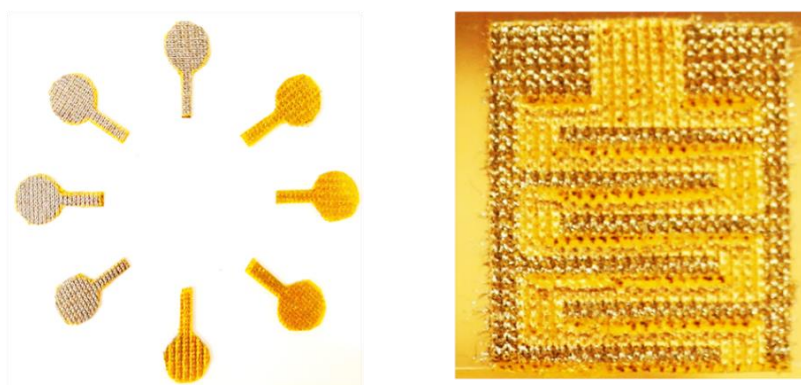

**Fig. S8** Various patterns were fabricated by the laser

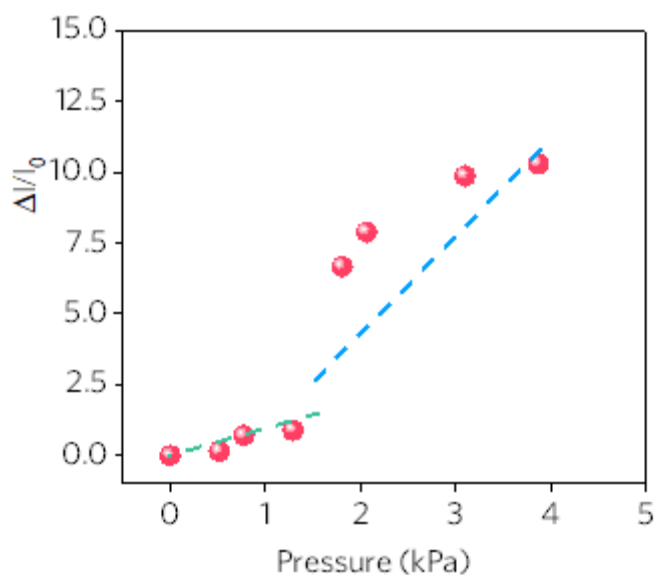

**Fig. S9** Current variation at low pressure range

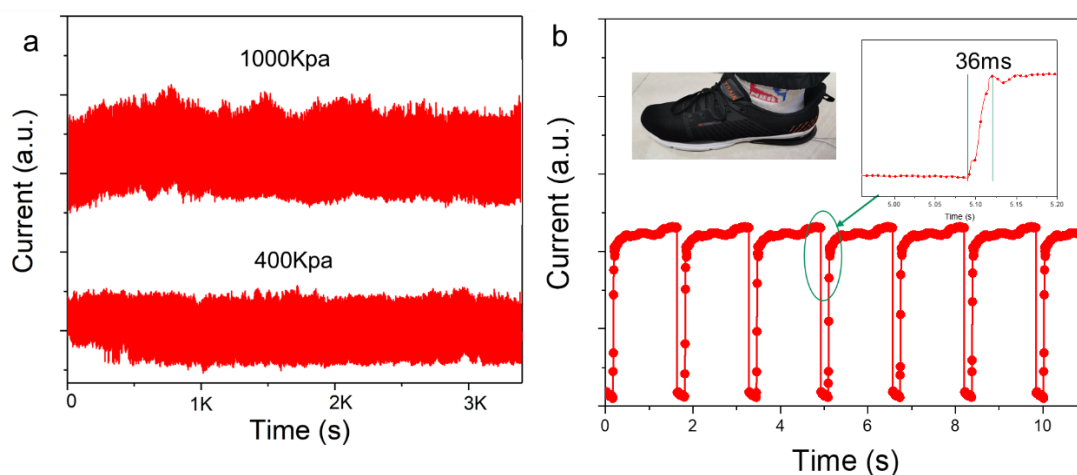

**Fig. S10 a** Durability test of the sensor under two higher applied pressure of 400 kPa and 1000kpa for 3500s, respectively; **b** practical response time of our sensor under the plantar pressure from one adult male co-author (weight: 75kg)

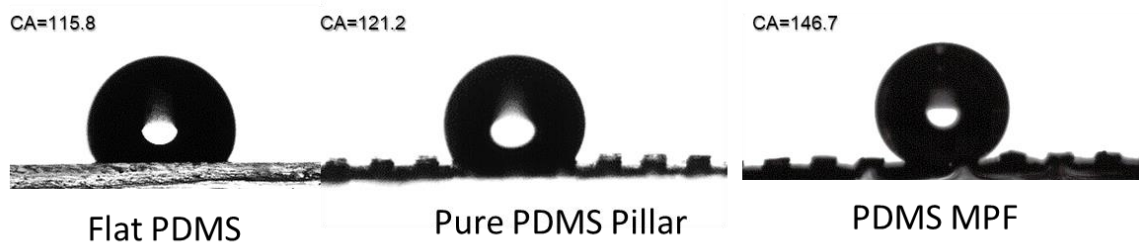

**Fig. S11** Water contact angle of various substrate

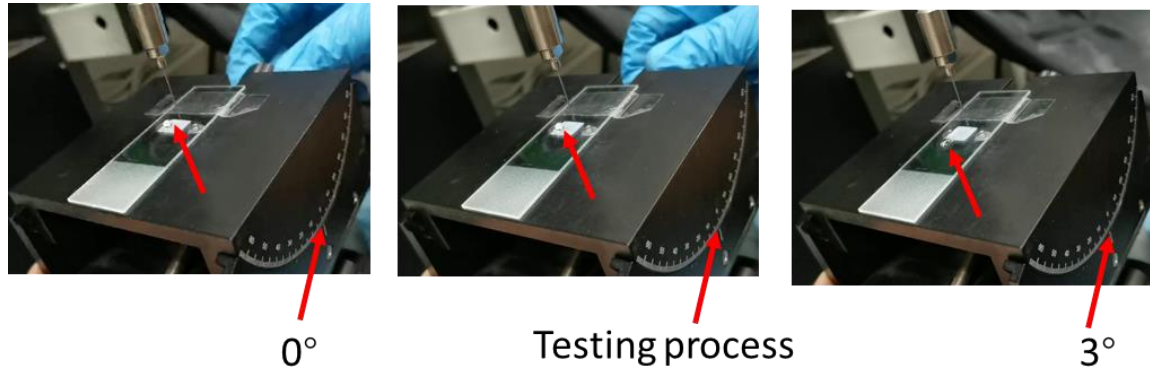

**Fig. S12** Roll-off angle testing of water droplet

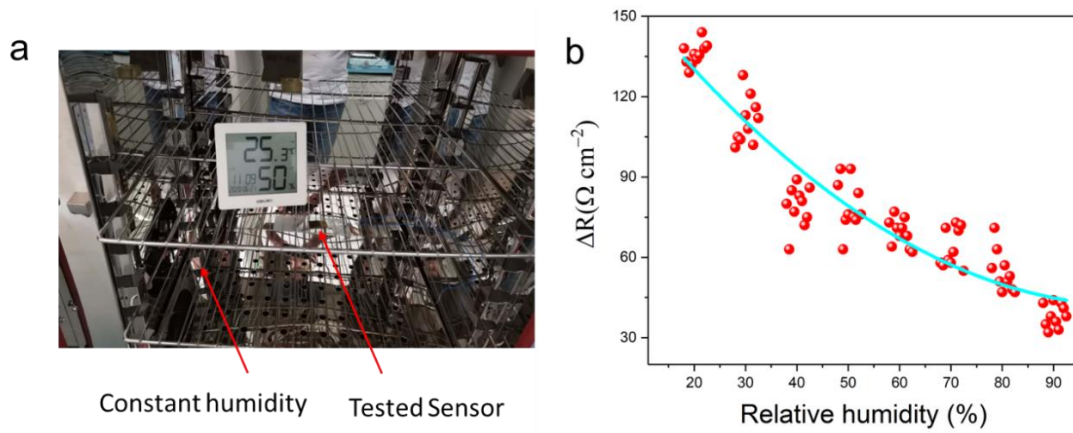

**Fig. S13** **a** testing schematic of the sensor in the constant humidity cabinet; **b** Sensor resistance changes versus different relative humidity

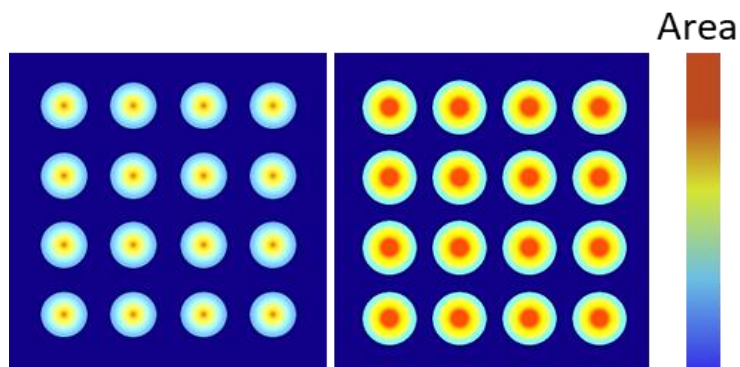

**Fig. S14** Contacting area greatly increased with the applied pressure

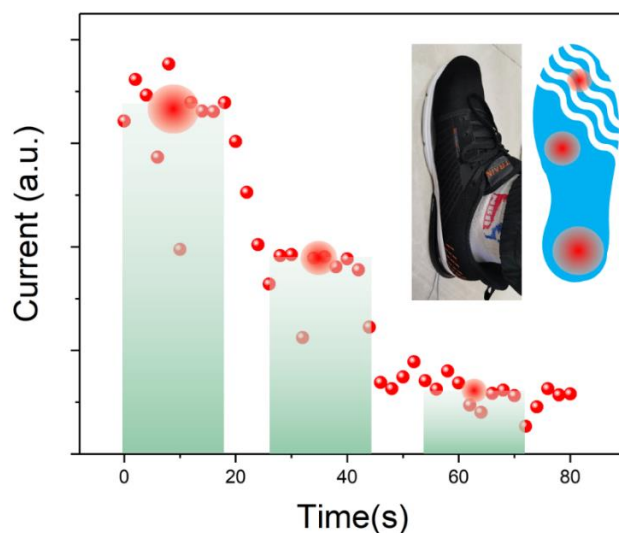

**Fig. S15** Practical investigation of our sensor under the plantar higher pressure (over 400 kpa) from one adult male co-author (weight: 75kg)

### Supplementary Movies

**Movie S1** Water was rapidly removed by the PDMS MPF

**Movie S2** Bouncing of the water droplet with 16 times slower

**Movie S3** *in situ* transmission electron microscopy (TEM) nano-mechanical test of the graphite flakes (GFs) with 4 times faster

**Movie S4** Wearable sensor was able to detect the pulse rate and wirelessly send it to the smart phone

**Movie S5** Flexible sensor can catch the gentle touch signal
